# Supplementary material for: Nutrition of marine mesograzers: integrating feeding behavior, nutrient intake and performance of an herbivorous amphipod
Source: PeerJ. 2018 Nov 9;6:e5929. doi: 10.7717/peerj.5929 (PMC6231427; doi:10.7717/peerj.5929)
Supplement: Supplemental Information 2 [file peerj-06-5929-s005.xlsx]

## Sheet: Survival
Individual	Diet	Time	Event		* Time represent the day of an event.
1	Endarachne	5	1		** Event represent if the animal is dead (1) or alive (0) at a specific time.
2	Endarachne	6	1
3	Endarachne	26	0		Period considered: between the first day of experiment and the day the first female presented eggs.
4	Endarachne	26	0
5	Endarachne	26	0
6	Endarachne	4	1
7	Endarachne	26	0
8	Endarachne	26	0
9	Endarachne	26	0
10	Endarachne	26	0
11	Endarachne	26	0
12	Endarachne	26	0
13	Endarachne	26	0
14	Endarachne	26	0
15	Endarachne	26	0
16	Endarachne	26	0
17	Endarachne	26	0
18	Endarachne	26	0
19	Endarachne	26	0
20	Endarachne	26	0
21	Endarachne	26	0
22	Endarachne	26	0
23	Endarachne	26	0
24	Endarachne	26	0
25	Endarachne	26	0
26	Endarachne	26	0
28	Endarachne	26	0
29	Endarachne	26	0
1	Egregia sp.	5	1
2	Egregia sp.	26	0
3	Egregia sp.	26	0
4	Egregia sp.	26	0
5	Egregia sp.	26	0
6	Egregia sp.	1	1
7	Egregia sp.	26	0
8	Egregia sp.	26	0
9	Egregia sp.	26	0
10	Egregia sp.	26	0
11	Egregia sp.	26	0
12	Egregia sp.	26	0
13	Egregia sp.	26	0
14	Egregia sp.	26	0
15	Egregia sp.	26	0
16	Egregia sp.	26	0
17	Egregia sp.	26	0
18	Egregia sp.	26	0
19	Egregia sp.	26	0
20	Egregia sp.	26	0
21	Egregia sp.	26	0
22	Egregia sp.	26	0
23	Egregia sp.	26	0
24	Egregia sp.	26	0
25	Egregia sp.	26	0
26	Egregia sp.	26	0
28	Egregia sp.	26	0
29	Egregia sp.	26	0
1	Gelidium	6	1
2	Gelidium	3	1
3	Gelidium	26	0
4	Gelidium	26	0
5	Gelidium	26	0
6	Gelidium	26	0
7	Gelidium	26	0
8	Gelidium	26	0
10	Gelidium	26	0
11	Gelidium	26	0
12	Gelidium	26	0
13	Gelidium	26	0
14	Gelidium	4	1
15	Gelidium	26	0
16	Gelidium	26	0
17	Gelidium	1	1
18	Gelidium	26	0
19	Gelidium	10	1
20	Gelidium	12	1
21	Gelidium	26	0
22	Gelidium	26	0
23	Gelidium	26	0
24	Gelidium	26	0
25	Gelidium	26	0
26	Gelidium	26	0
27	Gelidium	5	1
28	Gelidium	26	0
29	Gelidium	26	0
1	Sargassum	6	1
2	Sargassum	26	0
3	Sargassum	26	0
5	Sargassum	26	0
6	Sargassum	26	0
7	Sargassum	26	0
8	Sargassum	26	0
9	Sargassum	26	0
10	Sargassum	26	0
11	Sargassum	26	0
12	Sargassum	26	0
13	Sargassum	26	0
14	Sargassum	26	0
15	Sargassum	18	1
16	Sargassum	26	0
17	Sargassum	26	0
18	Sargassum	26	0
19	Sargassum	12	1
20	Sargassum	26	0
21	Sargassum	26	0
22	Sargassum	26	0
23	Sargassum	26	0
24	Sargassum	26	0
25	Sargassum	26	0
26	Sargassum	26	0
27	Sargassum	26	0
28	Sargassum	26	0
29	Sargassum	26	0
1	Padina sp.	6	1
2	Padina sp.	6	1
3	Padina sp.	26	0
4	Padina sp.	26	0
6	Padina sp.	3	1
7	Padina sp.	26	0
8	Padina sp.	26	0
9	Padina sp.	26	0
10	Padina sp.	9	1
11	Padina sp.	26	0
12	Padina sp.	26	0
13	Padina sp.	3	1
14	Padina sp.	26	0
15	Padina sp.	11	1
16	Padina sp.	26	0
17	Padina sp.	26	0
18	Padina sp.	26	0
19	Padina sp.	26	0
20	Padina sp.	26	0
21	Padina sp.	4	1
22	Padina sp.	26	0
23	Padina sp.	26	0
24	Padina sp.	26	0
25	Padina sp.	7	1
26	Padina sp.	26	0
27	Padina sp.	26	0
28	Padina sp.	26	0
29	Padina sp.	26	0
1	Ulva sp.	3	1
2	Ulva sp.	15	1
4	Ulva sp.	26	0
5	Ulva sp.	18	1
6	Ulva sp.	26	0
7	Ulva sp.	22	1
8	Ulva sp.	26	0
9	Ulva sp.	26	0
10	Ulva sp.	26	0
11	Ulva sp.	24	1
12	Ulva sp.	21	1
13	Ulva sp.	26	0
14	Ulva sp.	12	1
15	Ulva sp.	26	0
16	Ulva sp.	18	1
17	Ulva sp.	26	0
18	Ulva sp.	23	1
19	Ulva sp.	6	1
20	Ulva sp.	26	0
21	Ulva sp.	26	0
22	Ulva sp.	26	0
23	Ulva sp.	26	0
24	Ulva sp.	26	0
25	Ulva sp.	23	1
26	Ulva sp.	11	1
27	Ulva sp.	5	1
28	Ulva sp.	19	1
29	Ulva sp.	26	0
1	Hormophysa	8	1
2	Hormophysa	26	0
3	Hormophysa	8	1
4	Hormophysa	26	0
5	Hormophysa	26	0
7	Hormophysa	26	0
8	Hormophysa	26	0
9	Hormophysa	26	0
10	Hormophysa	26	0
11	Hormophysa	26	0
12	Hormophysa	26	0
13	Hormophysa	26	0
14	Hormophysa	26	0
15	Hormophysa	26	0
16	Hormophysa	26	0
17	Hormophysa	26	0
18	Hormophysa	26	0
19	Hormophysa	26	0
20	Hormophysa	26	0
22	Hormophysa	26	0
23	Hormophysa	26	0
24	Hormophysa	26	0
25	Hormophysa	26	0
26	Hormophysa	26	0
27	Hormophysa	26	0
28	Hormophysa	26	0
29	Hormophysa	26	0
1	Turbinaria sp.	26	0
2	Turbinaria sp.	2	1
3	Turbinaria sp.	26	0
4	Turbinaria sp.	26	0
5	Turbinaria sp.	26	0
6	Turbinaria sp.	26	0
7	Turbinaria sp.	26	0
8	Turbinaria sp.	4	1
9	Turbinaria sp.	26	0
10	Turbinaria sp.	26	0
11	Turbinaria sp.	26	0
12	Turbinaria sp.	9	1
13	Turbinaria sp.	26	0
14	Turbinaria sp.	26	0
15	Turbinaria sp.	26	0
16	Turbinaria sp.	26	0
17	Turbinaria sp.	26	0
18	Turbinaria sp.	26	0
19	Turbinaria sp.	26	0
20	Turbinaria sp.	26	0
21	Turbinaria sp.	4	1
22	Turbinaria sp.	13	1
23	Turbinaria sp.	3	1
24	Turbinaria sp.	26	0
25	Turbinaria sp.	26	0
26	Turbinaria sp.	26	0
27	Turbinaria sp.	26	0
28	Turbinaria sp.	26	0
29	Turbinaria sp.	26	0
1	Agar	5	1
2	Agar	2	1
3	Agar	6	1
4	Agar	4	1
5	Agar	26	0
6	Agar	5	1
7	Agar	13	1
8	Agar	7	1
9	Agar	9	1
10	Agar	1	1
11	Agar	8	1
12	Agar	10	1
13	Agar	5	1
14	Agar	8	1
15	Agar	3	1
16	Agar	12	1
17	Agar	14	1
18	Agar	10	1
19	Agar	7	1
20	Agar	12	1
23	Agar	11	1
24	Agar	26	0
25	Agar	11	1
26	Agar	10	1
27	Agar	4	1
28	Agar	8	1
29	Agar	12	1
1	Control	4	1
2	Control	7	1
3	Control	5	1
5	Control	5	1
6	Control	3	1
7	Control	8	1
8	Control	6	1
9	Control	7	1
10	Control	7	1
11	Control	5	1
12	Control	8	1
13	Control	7	1
14	Control	4	1
15	Control	5	1
16	Control	7	1
17	Control	6	1
18	Control	6	1
19	Control	7	1
20	Control	7	1
22	Control	6	1
23	Control	4	1
24	Control	9	1
25	Control	6	1
26	Control	5	1
27	Control	5	1
28	Control	5	1
29	Control	5	1

## Sheet: Growth
Diet	Size.mm	Days alive	Growth
Endarachne	7.623	40	0.190575
Endarachne	8.281	40	0.207025
Endarachne	7.737	40	0.193425
Endarachne	8.413	40	0.210325
Endarachne	8.494	40	0.21235
Endarachne	3.772	40	0.0943
Endarachne	8.091	31	0.261
Endarachne	7.591	40	0.189775
Endarachne	7.242	26	0.278538
Endarachne	7.592	40	0.1898
Endarachne	7.862	31	0.253613
Endarachne	6.318	40	0.15795
Endarachne	7.001	40	0.175025
Endarachne	7.581	40	0.189525
Endarachne	7.339	32	0.229344
Endarachne	7.839	40	0.195975
Endarachne	7.72	40	0.193
Endarachne	6.561	35	0.187457
Endarachne	7.103	31	0.229129
Endarachne	6.072	40	0.1518
Endarachne	5.923	40	0.148075
Endarachne	7.133	37	0.192784
Endarachne	5.804	40	0.1451
Endarachne	7.035	40	0.175875
Endarachne	8.19	34	0.240882
Egregia sp.	5.328	40	0.1332
Egregia sp.	5.43	40	0.13575
Egregia sp.	5.787	40	0.144675
Egregia sp.	7.366	37	0.199081
Egregia sp.	5.84	40	0.146
Egregia sp.	7.047	40	0.176175
Egregia sp.	8.527	40	0.213175
Egregia sp.	7.405	40	0.185125
Egregia sp.	7.231	31	0.233258
Egregia sp.	6.617	30	0.220567
Egregia sp.	7.22	40	0.1805
Egregia sp.	7.117	40	0.177925
Egregia sp.	6.827	40	0.170675
Egregia sp.	6.861	40	0.171525
Egregia sp.	6.992	30	0.233067
Egregia sp.	6.351	40	0.158775
Egregia sp.	6.811	38	0.179237
Egregia sp.	6.731	40	0.168275
Egregia sp.	5.562	40	0.13905
Egregia sp.	5.159	40	0.128975
Egregia sp.	4.839	40	0.120975
Egregia sp.	6.294	40	0.15735
Egregia sp.	7.7	40	0.1925
Egregia sp.	7.173	40	0.179325
Egregia sp.	6.476	40	0.1619
Egregia sp.	6.114	40	0.15285
Gelidium	8.831	37	0.238676
Gelidium	8.722	40	0.21805
Gelidium	8.322	38	0.219
Gelidium	7.75	40	0.19375
Gelidium	6.41	33	0.194242
Gelidium	8.491	35	0.2426
Gelidium	7.313	38	0.192447
Gelidium	8.557	40	0.213925
Gelidium	8.243	35	0.235514
Gelidium	7.48	31	0.24129
Gelidium	7.344	40	0.1836
Gelidium	7.89	32	0.246562
Gelidium	8.205	31	0.264677
Gelidium	3.625	10	0.3625
Gelidium	2.665	12	0.222083
Gelidium	7.546	40	0.18865
Gelidium	7.521	40	0.188025
Gelidium	7.647	40	0.191175
Gelidium	8.4	40	0.21
Gelidium	8.851	40	0.221275
Gelidium	8.06	29	0.277931
Gelidium	8.294	40	0.20735
Gelidium	8.07	40	0.20175
Sargassum	4.454	40	0.11135
Sargassum	5.033	40	0.125825
Sargassum	6	40	0.15
Sargassum	6.044	40	0.1511
Sargassum	6.435	40	0.160875
Sargassum	5.9	40	0.1475
Sargassum	5.882	40	0.14705
Sargassum	5.821	40	0.145525
Sargassum	5.193	40	0.129825
Sargassum	4.842	40	0.12105
Sargassum	5.255	40	0.131375
Sargassum	5.474	40	0.13685
Sargassum	2.856	18	0.158667
Sargassum	6.246	40	0.15615
Sargassum	6.953	40	0.173825
Sargassum	5.989	40	0.149725
Sargassum	5.678	40	0.14195
Sargassum	5.294	40	0.13235
Sargassum	5.866	40	0.14665
Sargassum	4.158	40	0.10395
Sargassum	5.412	40	0.1353
Sargassum	5.539	40	0.138475
Sargassum	5.805	40	0.145125
Sargassum	5.431	40	0.135775
Sargassum	5.227	40	0.130675
Sargassum	5.781	40	0.144525
Padina sp.	5.589	40	0.139725
Padina sp.	7.482	40	0.18705
Padina sp.	7.642	37	0.206541
Padina sp.	7.361	40	0.184025
Padina sp.	7.253	37	0.196027
Padina sp.	2.986	9	0.331778
Padina sp.	7.212	39	0.184923
Padina sp.	7.323	40	0.183075
Padina sp.	7.39	32	0.230937
Padina sp.	3.19	11	0.29
Padina sp.	6.308	40	0.1577
Padina sp.	7.794	40	0.19485
Padina sp.	7.036	40	0.1759
Padina sp.	7.622	39	0.195436
Padina sp.	6.042	40	0.15105
Padina sp.	5.485	40	0.137125
Padina sp.	4.429	40	0.110725
Padina sp.	6.516	40	0.1629
Padina sp.	6.779	40	0.169475
Padina sp.	5.935	40	0.148375
Padina sp.	6.984	40	0.1746
Padina sp.	7.133	36	0.198139
Ulva sp.	2.608	15	0.173867
Ulva sp.	7.784	35	0.2224
Ulva sp.	3.365	18	0.186944
Ulva sp.	5.22	36	0.145
Ulva sp.	4.356	22	0.198
Ulva sp.	4.915	36	0.136528
Ulva sp.	6.32	36	0.175556
Ulva sp.	3.918	40	0.09795
Ulva sp.	4.314	24	0.17975
Ulva sp.	4.144	21	0.197333
Ulva sp.	4.688	26	0.180308
Ulva sp.	4.448	12	0.370667
Ulva sp.	5.431	40	0.135775
Ulva sp.	4.144	18	0.230222
Ulva sp.	6.517	39	0.167103
Ulva sp.	4.77	23	0.207391
Ulva sp.	5.359	30	0.178633
Ulva sp.	4.955	34	0.145735
Ulva sp.	4.926	40	0.12315
Ulva sp.	5.269	40	0.131725
Ulva sp.	3.862	28	0.137929
Ulva sp.	4.21	23	0.183043
Ulva sp.	3.792	19	0.199579
Ulva sp.	5.069	32	0.158406
Hormophysa	4.668	40	0.1167
Hormophysa	4.588	40	0.1147
Hormophysa	5.619	40	0.140475
Hormophysa	4.912	40	0.1228
Hormophysa	4.742	40	0.11855
Hormophysa	5.67	40	0.14175
Hormophysa	5.831	40	0.145775
Hormophysa	5.291	40	0.132275
Hormophysa	5.242	40	0.13105
Hormophysa	5.101	40	0.127525
Hormophysa	4.867	40	0.121675
Hormophysa	4.946	40	0.12365
Hormophysa	4.888	40	0.1222
Hormophysa	5.228	40	0.1307
Hormophysa	4.197	40	0.104925
Hormophysa	4.644	40	0.1161
Hormophysa	4.532	40	0.1133
Hormophysa	4.976	40	0.1244
Hormophysa	4.346	40	0.10865
Hormophysa	5.041	40	0.126025
Hormophysa	5.744	40	0.1436
Hormophysa	5.096	40	0.1274
Hormophysa	4.248	40	0.1062
Hormophysa	4.826	40	0.12065
Hormophysa	4.587	40	0.114675
Turbinaria sp.	3.55	40	0.08875
Turbinaria sp.	4.211	40	0.105275
Turbinaria sp.	3.665	40	0.091625
Turbinaria sp.	3.87	40	0.09675
Turbinaria sp.	2.239	34	0.0658529
Turbinaria sp.	4.108	40	0.1027
Turbinaria sp.	3.041	31	0.0980968
Turbinaria sp.	4.648	40	0.1162
Turbinaria sp.	4.497	40	0.112425
Turbinaria sp.	2.701	9	0.300111
Turbinaria sp.	4.929	40	0.123225
Turbinaria sp.	4.496	40	0.1124
Turbinaria sp.	5.138	40	0.12845
Turbinaria sp.	4.059	40	0.101475
Turbinaria sp.	4.993	40	0.124825
Turbinaria sp.	4.079	40	0.101975
Turbinaria sp.	4.415	40	0.110375
Turbinaria sp.	4.189	40	0.104725
Turbinaria sp.	4.821	40	0.120525
Turbinaria sp.	4.309	40	0.107725
Turbinaria sp.	4.778	40	0.11945
Turbinaria sp.	4.362	40	0.10905
Turbinaria sp.	4.609	40	0.115225
Turbinaria sp.	4.313	40	0.107825

## Sheet: Reproduction
Diet	Time to ovulation	Number of eggs
Endarachne	31	5
Endarachne	26	7
Endarachne	31	2
Endarachne	32	2
Endarachne	35	5
Endarachne	31	10
Endarachne	37	4
Endarachne	34	3
Egregia sp.	37	6
Egregia sp.	31	7
Egregia sp.	30	7
Egregia sp.	30	5
Egregia sp.	38	1
Gelidium	37	11
Gelidium	40	5
Gelidium	38	1
Gelidium	33	7
Gelidium	35	6
Gelidium	38	6
Gelidium	40	9
Gelidium	35	9
Gelidium	31	7
Gelidium	32	11
Gelidium	31	7
Gelidium	29	7
Padina sp.	37	9
Padina sp.	37	4
Padina sp.	39	5
Padina sp.	32	6
Padina sp.	39	1
