# Supplementary material for: Nutrition of marine mesograzers: integrating feeding behavior, nutrient intake and performance of an herbivorous amphipod
Source: PeerJ journal article supplement (doi:10.7717/peerj.5929), 2018-11-09
Supplement: Supplemental_Figure_S2.pdf [file Supplemental_Figure_S2.pdf]

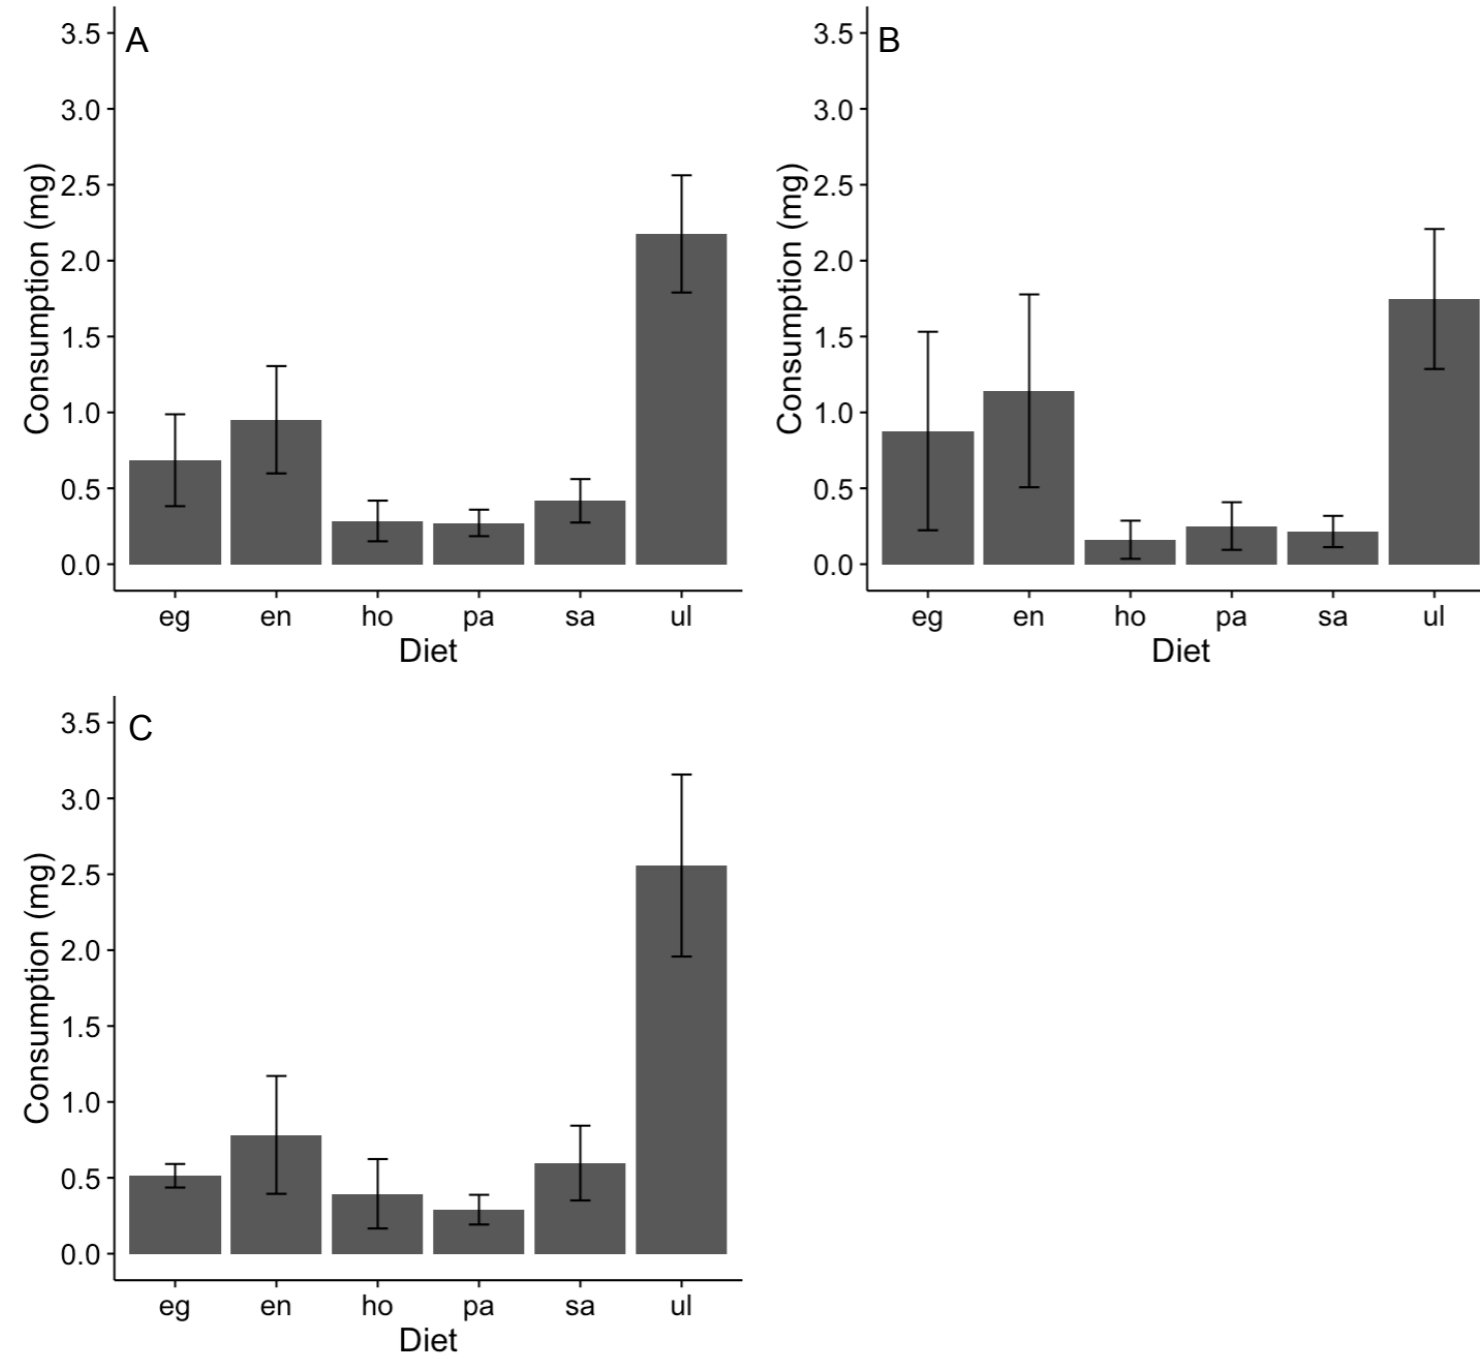

Figure S2. Consumption (mean±SE) of algal diets by *Ampithoe valida* in choice experiment. (A) Data represents a summary across all trials; (B) First trial; (C) Second trial. eg = *Egrecia* sp., en = *Endarachne*, ho = *Hormophysa* sp., pa = *Padina* sp., sa = *Sargassum* sp., ul = *Ulva* spp.
